# Supplementary material for: Electronic Health Record Availability and Anxiety Treatment in Office-Based Practices
Source: Atypon-hosted journal article supplement (doi:10.1176/appi.ps.201500150), 2016-05-02
Supplement: appi.ps.201500150.ds001.pdf [file appi.ps.201500150.ds001.pdf]

**Table 1 Characteristics of the sample of patient visits to primary care practices (N=290) with a reason for visit code and a physician diagnosis of anxiety by EHR status**

| Characteristic                          | Primary Care Visits |             |
|-----------------------------------------|---------------------|-------------|
|                                         | No EHR (N=175)      | EHR (N=115) |
|                                         | %                   | %           |
| Male (reference: female)                | 37.1                | 33.0        |
| Age(M±SD)                               | 45.7±15.3           | 42.52±16.7  |
| Race/ethnicity                          |                     |             |
| White                                   | 37.1                | 51.3        |
| African american                        | 2.3                 | 6.1         |
| Latino                                  | 1.1                 | 5.2         |
| Other race                              | 59.4                | 37.4        |
| Insurance                               |                     |             |
| Medicare                                | 14.3                | 14.8        |
| Medicaid                                | 12.0                | 8.7         |
| Self-pay                                | 13.1                | 9.6         |
| Private insurance                       | 61.7                | 64.3        |
| Primary care visits in past year (M±SD) | 4.35±4.65           | 5.29±5.65   |
| Practice ownership                      |                     |             |
| Physician-owned practice                | 70.3                | 50.4        |
| Community health center                 | 20.0                | 14.8        |
| HMO                                     | .6                  | 7.0         |
| Academic practice                       | .6                  | 1.7         |
| Other                                   | 8.6                 | 26.1        |
| Income range                            |                     |             |
| Median income quartile 1                | 14.9                | 10.4        |
| Median income quartile 2                | 19.4                | 14.8        |
| Median income quartile 3                | 26.9                | 15.7        |
| Median income quartile 4                | 18.9                | 15.7        |
| Region                                  |                     |             |
| Living in north                         | 23.4                | 14.8        |
| Living in midwest                       | 33.7                | 32.2        |
| Living in south                         | 24.6                | 21.7        |
| Living in west                          | 18.3                | 31.3        |

**Table 2 Percent of weighted sample of visits to a primary care practice with antianxiety medication, mental health counseling, or any anxiety treatment <sup>a</sup>**

| Variable                 | No EHR |           | EHR  |           | Total |           |
|--------------------------|--------|-----------|------|-----------|-------|-----------|
|                          | %      | 95% CI    | %    | 95% CI    | %     | 95% CI    |
| Primary care practices   | 38.8   | 29.3-48.3 | 61.2 | 51.7-70.7 | -     | -         |
| Antianxiety medication   | 81.9   | 74.0-89.7 | 69.2 | 58.7-80.7 | 77.0  | 70.5-83.5 |
| Mental health counseling | 36.6   | 24.5-48.8 | 18.1 | 9.39-26.8 | 29.4  | 21.5-37.4 |
| Any anxiety treatment    | 85.8   | 78.3-93.2 | 74.8 | 62.9-86.7 | 81.5  | 75.0-88.0 |

<sup>a</sup>Data are a weighted sample from the 2007-2010 National Ambulatory Medical Care Surveys and are limited to visits at a primary care practice by patients with a reason visit code and a physician diagnosis of anxiety.
